# Supplementary material for: Effects of a random copolymer's component distribution on its opto-electronic properties
Source: Royal Society of Chemistry journal article supplement (doi:10.1039/c7tc01280b), 2017-01-01
Supplement: c7tc01280b1.pdf [file c7tc01280b1.pdf]

## Supporting Information for

### Effects of Random Copolymer's Component Distribution on Opto-electronic Properties

*Zhiming Zhong, Xiaojun Wang, Sen Zhao, Feng Peng, Jian Wang,\* Lei Ying,\* Wei Yang, Junbiao Peng and Yong Cao*

Institute of Polymer Optoelectronic Materials and Devices, State Key Laboratory of

Luminescent Materials and Devices, South China University of Technology

Guangzhou 510640 (P. R. China)

\*E-mail: [jianwang@scut.edu.cn](mailto:jianwang@scut.edu.cn) (J.W.); [msleiyang@scut.edu.cn](mailto:msleiyang@scut.edu.cn) (L.Y.)

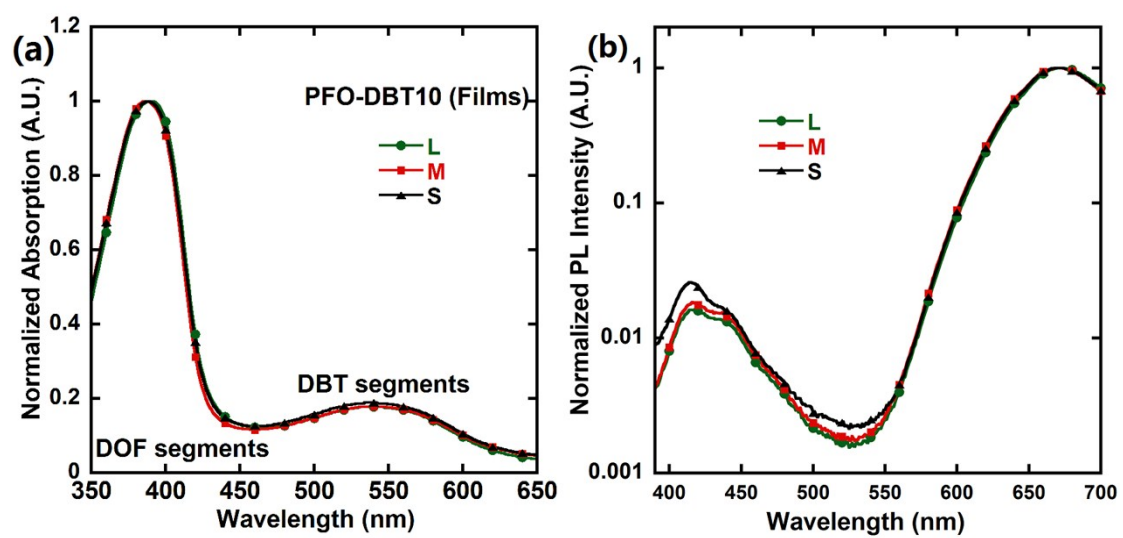

**Figure S1.** (a) The absorption spectra and (b) the PL spectra (the excitation wavelength is 360 nm) of the random polymers in solid state films.

**Table S1.** The data in Figure 3.

| <b>PFO-DBT10-L with 106 DOF-DOF<sub>0.8</sub>DBT<sub>0.2</sub> units</b> |                    |          |           |                    |          |
|--------------------------------------------------------------------------|--------------------|----------|-----------|--------------------|----------|
| DBT Units                                                                | Unnormalized Ratio | DOF/DBT  | DBT Units | Unnormalized Ratio | DOF/DBT  |
| 0 (PFO)                                                                  | 5.33997E-11        | N/A      | 54        | 1.01303E-12        | 2.925926 |
| 1                                                                        | 1.41509E-09        | 211      | 55        | 2.39444E-13        | 2.854545 |
| 2                                                                        | 1.85731E-08        | 105      | 56        | 5.45163E-14        | 2.785714 |
| 3                                                                        | 1.60967E-07        | 69.66667 | 57        | 1.19553E-14        | 2.719298 |
| 4                                                                        | 1.03622E-06        | 52       | 58        | 2.52505E-15        | 2.655172 |
| 5                                                                        | 5.28474E-06        | 41.4     | 59        | 5.13569E-16        | 2.59322  |
| 6                                                                        | 2.22399E-05        | 34.33333 | 60        | 1.00574E-16        | 2.533333 |
| 7                                                                        | 7.94283E-05        | 29.28571 | 61        | 1.89607E-17        | 2.47541  |
| 8                                                                        | 0.000245731        | 25.5     | 62        | 3.44044E-18        | 2.419355 |
| 9                                                                        | 0.000668935        | 22.55556 | 63        | 6.00712E-19        | 2.365079 |
| 10                                                                       | 0.001622168        | 20.2     | 64        | 1.00901E-19        | 2.3125   |
| 11                                                                       | 0.003539277        | 18.27273 | 65        | 1.62994E-20        | 2.261538 |
| 12                                                                       | 0.007004818        | 16.66667 | 66        | 2.53134E-21        | 2.212121 |
| 13                                                                       | 0.012662556        | 15.30769 | 67        | 3.77812E-22        | 2.164179 |
| 14                                                                       | 0.021028888        | 14.14286 | 68        | 5.41716E-23        | 2.117647 |
| 15                                                                       | 0.032244295        | 13.13333 | 69        | 7.45841E-24        | 2.072464 |
| 16                                                                       | 0.045847357        | 12.25    | 70        | 9.85576E-25        | 2.028571 |
| 17                                                                       | 0.060680325        | 11.47059 | 71        | 1.24932E-25        | 1.985915 |
| 18                                                                       | 0.075007625        | 10.77778 | 72        | 1.51827E-26        | 1.944444 |
| 19                                                                       | 0.086850934        | 10.15789 | 73        | 1.76785E-27        | 1.90411  |
| 20                                                                       | 0.09445039         | 9.6      | 74        | 1.97092E-28        | 1.864865 |
| 21                                                                       | 0.096699209        | 9.095238 | 75        | 2.10231E-29        | 1.826667 |
| 22                                                                       | 0.093402645        | 8.636364 | 76        | 2.1438E-30         | 1.789474 |
| 23                                                                       | 0.085280676        | 8.217391 | 77        | 2.08812E-31        | 1.753247 |
| 24                                                                       | 0.073732251        | 7.833333 | 78        | 1.94088E-32        | 1.717949 |
| 25                                                                       | 0.060460446        | 7.48     | 79        | 1.71977E-33        | 1.683544 |
| 26                                                                       | 0.047089386        | 7.153846 | 80        | 1.45105E-34        | 1.65     |
| 27                                                                       | 0.034881027        | 6.851852 | 81        | 1.16443E-35        | 1.617284 |
| 28                                                                       | 0.024603581        | 6.571429 | 82        | 8.8752E-37         | 1.585366 |
| 29                                                                       | 0.016543787        | 6.310345 | 83        | 6.4158E-38         | 1.554217 |
| 30                                                                       | 0.010615597        | 6.066667 | 84        | 4.39177E-39        | 1.52381  |
| 31                                                                       | 0.006506334        | 5.83871  | 85        | 2.84173E-40        | 1.494118 |
| 32                                                                       | 0.003812305        | 5.625    | 86        | 1.73478E-41        | 1.465116 |
| 33                                                                       | 0.002137201        | 5.424242 | 87        | 9.97E-43           | 1.436782 |
| 34                                                                       | 0.001147174        | 5.235294 | 88        | 5.38153E-44        | 1.409091 |
| 35                                                                       | 0.000589975        | 5.057143 | 89        | 2.721E-45          | 1.382022 |
| 36                                                                       | 0.000290891        | 4.888889 | 90        | 1.28492E-46        | 1.355556 |

|    |             |          |             |             |          |
|----|-------------|----------|-------------|-------------|----------|
| 37 | 0.000137583 | 4.72973  | 91          | 5.64799E-48 | 1.32967  |
| 38 | 6.24556E-05 | 4.578947 | 92          | 2.30217E-49 | 1.304348 |
| 39 | 2.72242E-05 | 4.435897 | 93          | 8.66407E-51 | 1.27957  |
| 40 | 1.14002E-05 | 4.3      | 94          | 2.99556E-52 | 1.255319 |
| 41 | 4.58787E-06 | 4.170732 | 95          | 9.45965E-54 | 1.231579 |
| 42 | 1.77507E-06 | 4.047619 | 96          | 2.7098E-55  | 1.208333 |
| 43 | 6.6049E-07  | 3.930233 | 97          | 6.98401E-57 | 1.185567 |
| 44 | 2.36425E-07 | 3.818182 | 98          | 1.60347E-58 | 1.163265 |
| 45 | 8.14354E-08 | 3.711111 | 99          | 3.23934E-60 | 1.141414 |
| 46 | 2.69976E-08 | 3.608696 | 100         | 5.66884E-62 | 1.12     |
| 47 | 8.61626E-09 | 3.510638 | 101         | 8.41907E-64 | 1.09901  |
| 48 | 2.6477E-09  | 3.416667 | 102         | 1.03175E-65 | 1.078431 |
| 49 | 7.83505E-10 | 3.326531 | 103         | 1.0017E-67  | 1.058252 |
| 50 | 2.23299E-10 | 3.24     | 104         | 7.22378E-70 | 1.038462 |
| 51 | 6.12977E-11 | 3.156863 | 105         | 3.4399E-72  | 1.019048 |
| 52 | 1.62085E-11 | 3.076923 | 106         | 8.11296E-75 | 1        |
| 53 | 4.12859E-12 | 3        | (PFO-DBT50) | <b>SUM</b>  | <b>1</b> |

**PFO-DBT10-M with 58 DOF-DOF<sub>0.8</sub>DBT<sub>0.2</sub> units**

| DBT Units | Unnormalized Ratio | DOF/DBT     | DBT Units | Unnormalized Ratio | DOF/DBT     |
|-----------|--------------------|-------------|-----------|--------------------|-------------|
| 0 (PFO)   | 2.39452E-06        | N/A         | 30        | 6.03657E-08        | 2.866666667 |
| 1         | 3.47206E-05        | 115         | 31        | 1.3631E-08         | 2.741935484 |
| 2         | 0.000247384        | 57          | 32        | 2.87528E-09        | 2.625       |
| 3         | 0.00115446         | 37.66666667 | 33        | 5.66343E-10        | 2.515151515 |
| 4         | 0.003968456        | 28          | 34        | 1.04107E-10        | 2.411764706 |
| 5         | 0.010714832        | 22.2        | 35        | 1.7847E-11         | 2.314285714 |
| 6         | 0.023661921        | 18.33333333 | 36        | 2.85055E-12        | 2.222222222 |
| 7         | 0.043943567        | 15.57142857 | 37        | 4.23731E-13        | 2.135135135 |
| 8         | 0.07003506         | 13.5        | 38        | 5.85418E-14        | 2.052631579 |
| 9         | 0.097270917        | 11.88888889 | 39        | 7.50536E-15        | 1.974358974 |
| 10        | 0.119156873        | 10.6        | 40        | 8.91261E-16        | 1.9         |
| 11        | 0.129989316        | 9.545454545 | 41        | 9.78214E-17        | 1.829268293 |
| 12        | 0.127281206        | 8.666666667 | 42        | 9.89859E-18        | 1.761904762 |
| 13        | 0.112594913        | 7.923076923 | 43        | 9.20799E-19        | 1.697674419 |
| 14        | 0.090478055        | 7.285714286 | 44        | 7.84772E-20        | 1.636363636 |
| 15        | 0.066350573        | 6.733333333 | 45        | 6.10378E-21        | 1.577777778 |
| 16        | 0.044579292        | 6.25        | 46        | 4.31245E-22        | 1.52173913  |
| 17        | 0.027534268        | 5.823529412 | 47        | 2.75263E-23        | 1.468085106 |
| 18        | 0.015679236        | 5.444444444 | 48        | 1.57703E-24        | 1.416666667 |
| 19        | 0.00825223         | 5.105263158 | 49        | 8.04606E-26        | 1.367346939 |
| 20        | 0.004022962        | 4.8         | 50        | 3.62073E-27        | 1.32        |
| 21        | 0.001819911        | 4.523809524 | 51        | 1.41989E-28        | 1.274509804 |

|    |             |             |             |             |             |
|----|-------------|-------------|-------------|-------------|-------------|
| 22 | 0.00076519  | 4.272727273 | 52          | 4.77849E-30 | 1.230769231 |
| 23 | 0.000299422 | 4.043478261 | 53          | 1.3524E-31  | 1.188679245 |
| 24 | 0.000109164 | 3.833333333 | 54          | 3.13056E-33 | 1.148148148 |
| 25 | 3.71159E-05 | 3.64        | 55          | 5.69193E-35 | 1.109090909 |
| 26 | 1.17772E-05 | 3.461538462 | 56          | 7.62312E-37 | 1.071428571 |
| 27 | 3.48953E-06 | 3.296296296 | 57          | 6.68694E-39 | 1.035087719 |
| 28 | 9.65851E-07 | 3.142857143 | 58          | 2.8823E-41  | 1           |
|    |             |             | (PFO-DBT50) |             |             |
| 29 | 2.49789E-07 | 3           | <b>SUM</b>  | <b>1</b>    |             |

**PFO-DBT10-S with 31 DOF-DOF<sub>0.8</sub>DBT<sub>0.2</sub> units**

| DBT Units | Unnormalized Ratio | DOF/DBT  | DBT Units   | Unnormalized Ratio | DOF/DBT     |
|-----------|--------------------|----------|-------------|--------------------|-------------|
| 0 (PFO)   | 0.000990352        | N/A      | 17          | 1.52867E-05        | 2.647058824 |
| 1         | 0.007675228        | 61       | 18          | 2.97242E-06        | 2.444444444 |
| 2         | 0.028782106        | 30       | 19          | 5.0844E-07         | 2.263157895 |
| 3         | 0.069556756        | 19.66667 | 20          | 7.6266E-08         | 2.1         |
| 4         | 0.121724323        | 14.5     | 21          | 9.98722E-09        | 1.952380952 |
| 5         | 0.164327836        | 11.4     | 22          | 1.13491E-09        | 1.818181818 |
| 6         | 0.178021822        | 9.333333 | 23          | 1.11024E-10        | 1.695652174 |
| 7         | 0.158948056        | 7.857143 | 24          | 9.25199E-12        | 1.583333333 |
| 8         | 0.119211042        | 6.75     | 25          | 6.4764E-13         | 1.48        |
| 9         | 0.07616261         | 5.888889 | 26          | 3.73638E-14        | 1.384615385 |
| 10        | 0.041889435        | 5.2      | 27          | 1.72981E-15        | 1.296296296 |
| 11        | 0.019992685        | 4.636364 | 28          | 6.17788E-17        | 1.214285714 |
| 12        | 0.008330285        | 4.166667 | 29          | 1.59773E-18        | 1.137931034 |
| 13        | 0.003043758        | 3.769231 | 30          | 2.66288E-20        | 1.066666667 |
| 14        | 0.000978351        | 3.428571 | 31          | 2.14748E-22        | 1           |
| 15        | 0.000277199        | 3.133333 | (PFO-DBT50) |                    |             |
| 16        | 6.92999E-05        | 2.875    | <b>SUM</b>  | <b>1</b>           |             |
